# Supplementary material for: New alignment-based sequence extraction software (ALiBaSeq) and its utility for deep level phylogenetics
Source: PeerJ journal article supplement (doi:10.7717/peerj.11019), 2021-03-31

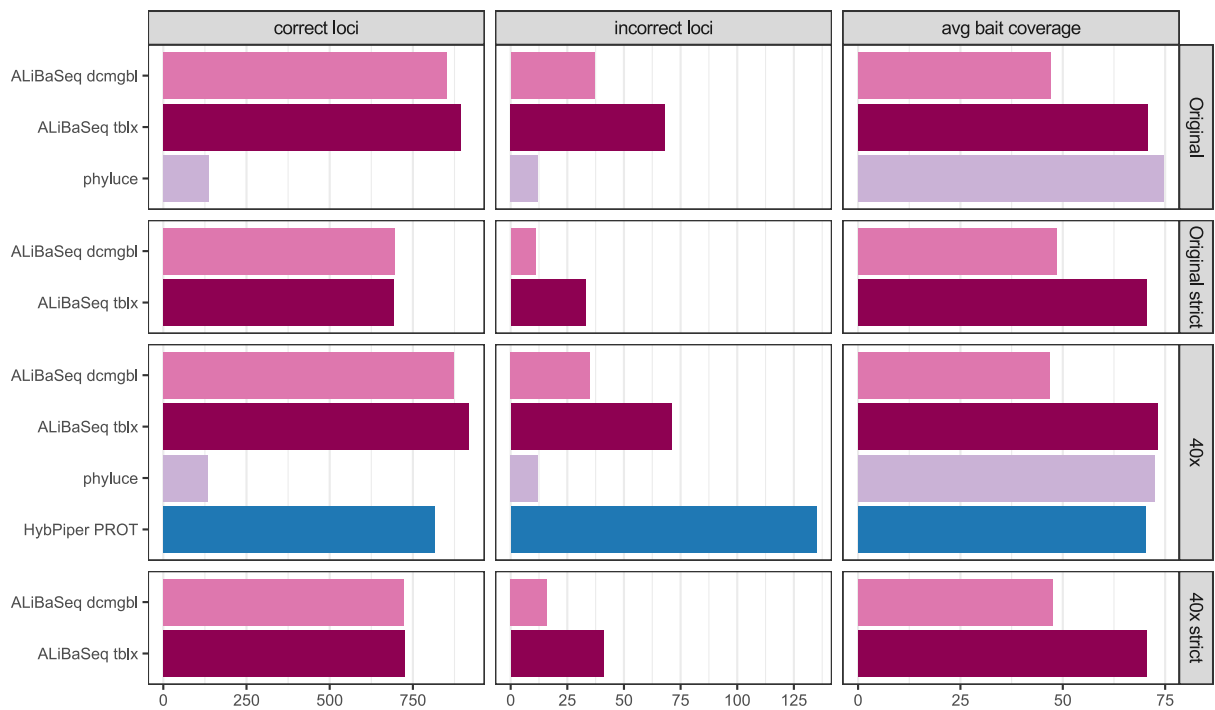

Supplement: FigS1.pdf [file FigS1.pdf]
